# Supplementary material for: Disulfide and Fully Reduced HMGB1 Induce Different Macrophage Polarization and Migration Patterns
Source: MDPI journal article supplement (doi:10.3390/biom11060800), 2021-05-28
Supplement: s1 [file s1]

**Disulphide and fully reduced HMGB1 induce different macrophage polarization and migration patterns****Supplementary Table S1.** P-values of ANOVA and Dunnett's T3 multiple comparisons test

| Gene | Comparison                                   | 95% confidence interval | Adjusted p-value |
|------|----------------------------------------------|-------------------------|------------------|
| Il6  | 4 h IL-4/IL-10/TGF $\beta$ vs. 4 h dsHMGB1   | -9,976 to 1,096         | 0,0385           |
|      | 7 h IL-4/IL-10/TGF $\beta$ vs. 7 h dsHMGB1   | -19,49 to -4,076        | 0,0074           |
|      | 24 h IL-4/IL-10/TGF $\beta$ vs. 24 h dsHMGB1 | -9,597 to 1,046         | 0,0527           |
| Tnf  | 4 h IL-4/IL-10/TGF $\beta$ vs. 4 h dsHMGB1   | -11,84 to -4,852        | 0,0020           |
|      | 7 h IL-4/IL-10/TGF $\beta$ vs. 7 h dsHMGB1   | -13,66 to -0,4393       | 0,0220           |
|      | 24 h IL-4/IL-10/TGF $\beta$ vs. 24 h dsHMGB1 | -7,914 to 1,753         | 0,0843           |
| Il10 | 4 h IL-4/IL-10/TGF $\beta$ vs. 4 h dsHMGB1   | -6,886 to 7,987         | 0,9920           |
|      | 7 h IL-4/IL-10/TGF $\beta$ vs. 7 h dsHMGB1   | -12,65 to 9,101         | 0,5523           |
|      | 24 h IL-4/IL-10/TGF $\beta$ vs. 24 h dsHMGB1 | -8,277 to 6,249         | 0,6472           |
| Arg1 | 4 h IL-4/IL-10/TGF $\beta$ vs. 4 h dsHMGB1   | 5,546 to 15,62          | 0,0016           |
|      | 7 h IL-4/IL-10/TGF $\beta$ vs. 7 h dsHMGB1   | 0,004570 to 30,35       | 0,0250           |
|      | 24 h IL-4/IL-10/TGF $\beta$ vs. 24 h dsHMGB1 | 17,40 to 22,47          | <0,0001          |
| Nos2 | 4 h IL-4/IL-10/TGF $\beta$ vs. 4 h dsHMGB1   | -22,69 to 8,666         | 0,1973           |
|      | 7 h IL-4/IL-10/TGF $\beta$ vs. 7 h dsHMGB1   | -17,84 to -6,295        | 0,0016           |
|      | 24 h IL-4/IL-10/TGF $\beta$ vs. 24 h dsHMGB1 | -15,65 to -4,793        | 0,0040           |

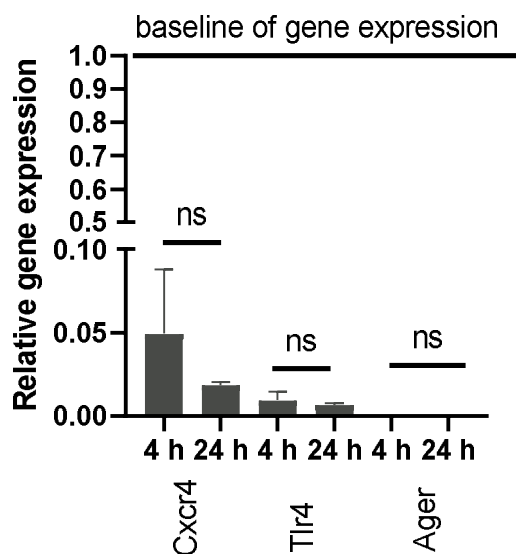

**Supplementary Figure 1.** Relative gene expression of Cxcr4, Tlr4 and Ager in unstimulated BMDMs. Relative gene expression was calculated by normalizing the gene of interest to expression of reference gene B2m.

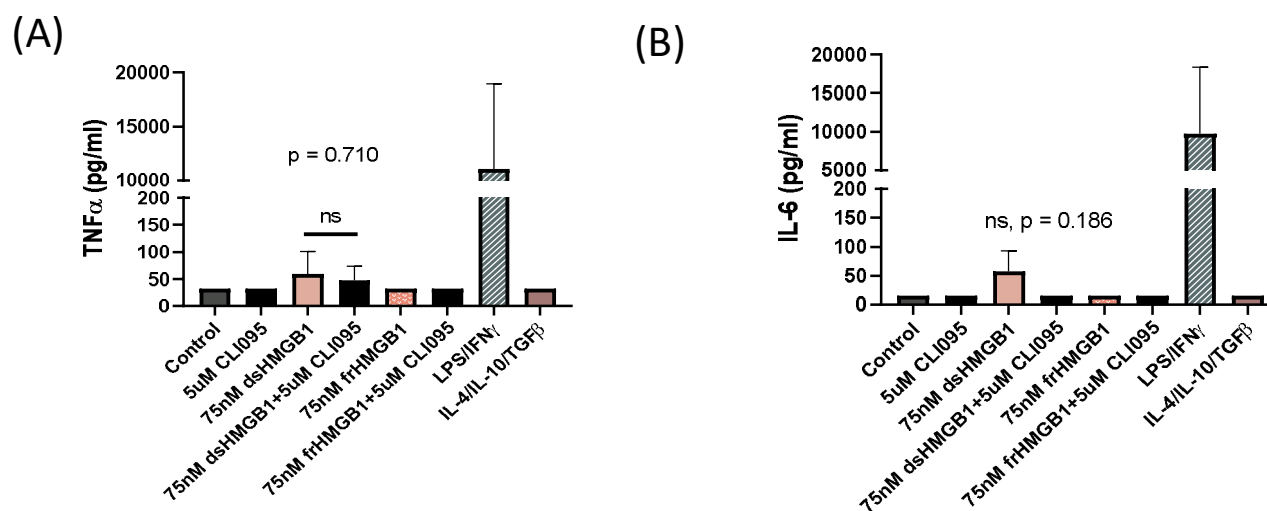

**Supplementary Figure 2.** Release of (A) TNFα and (B) IL-6 in response to dsHMGB1, frHMGB1, LPS/IFNγ and IL-4/IL-10/TGFβ stimulation for 24 h with and without CLI095.
